# Supplementary material for: Optimizing the electronic configuration of h-BN for boosting the photocatalytic transformation of acid gases under visible light
Source: Royal Society of Chemistry journal article supplement (doi:10.1039/d3va00239j), 2023-11-14
Supplement: d3va00239j1.pdf [file d3va00239j1.pdf]

## **Optimizing electronic configuration of h-BN for boosting photocatalytic transformation of acid gases under visible light**

Hao Yang<sup>a, b</sup>, Libin Zeng<sup>a</sup>, Jiali Wang<sup>a</sup>, Can Yang<sup>a\*</sup>

<sup>a</sup>*State Key Laboratory of Photocatalysis on Energy and Environment, College of Chemistry,*

*Fuzhou University, Fuzhou, 350116, P. R. China*

<sup>b</sup>*College of Chemical Engineering, Fuzhou University, Fuzhou, 350116, P. R. China*

\*Corresponding author. Email address: [canyang@fzu.edu.cn](mailto:canyang@fzu.edu.cn)

### **List of Captions:**

- 1. Material characterization**
- 2. Photocatalytic NO removal process**

**Scheme S1** Schematic diagram of the photocatalytic NO removal process

**Fig. S1** Mott-Schottky plots of BCN samples.

**Fig. S2** EPR pattern of BCN-2 under visible illumination.

**Fig. S3** Long-term stability test for BCN-2 and catalyst regeneration.

**Fig. S4** The XRD patterns of BCN-2 before and after desulfurization.

**Fig. S5** The FTIR patterns of BCN-2 before and after desulfurization.

**Fig. S6** In situ DRIFTS testing of H<sub>2</sub>S adsorption processes over BCN-2 sample.

**Fig. S7** The residual S on the surface of the BCN-2 is analyzed by XPS after a long-time.

**Table S1** Specific surface area, pore size and atomic percent of the BCN samples.

**Table S2** Detailed information on the normalization of the activity over BCN-2 under different wavelengths.

## 1. Material characterization

Powder X-ray diffraction (XRD) patterns were obtained on a Rigaku diffractometer (MiniFlex 600) with Cu K $\alpha$  at 40 kV. Fourier transform infrared spectroscopy (FTIR) spectra were recorded on a Thermo Nicolet iS50 Spectrometer with DTGS ATR detector. X-ray photoelectron spectroscopy (XPS, Thermo Scientific ESCALAB 250XI) was used to identify the surface chemical composition of samples. The scanning electron microscope (SEM) measurements were performed on a Hitachi S-8010 field-emission scanning electron microscope with an accelerating voltage of 5 kV. The transmission electron microscope (TEM) measurements were performed on a FEI talos F200s electron microscope equipped with an energy dispersive X-ray detector (EDX) at an acceleration voltage of 100 kV. The N<sub>2</sub> adsorption-desorption isotherms plots of samples were obtained by a Micromeritics ASAP 2020 analyzer and the specific surface area was calculated by Brunauer-Emmet-Teller (BET) method. The electron paramagnetic resonance (EPR) spectroscopy was conducted by a BRUKER A300 spectrometer. The light absorption performances were investigated by a UV-vis spectrometer (SolidSpec-3700, Shimadzu, Japan). The photoelectrochemical testing was performed by Bio-Logic VSP-300 electrochemical workstation. The temperature-programmed desorption curves of gas were recorded by a micromeritics AutoChem II 2920 Chemisorption analyzer.

## 2. Photocatalytic NO removal process

The photocatalytic NO removal process is shown in [Scheme S1](#). The surface dish containing 20 mg of catalyst was placed in a closed quartz reactor and an LED

lamp was used as the light source. Using standard air to dilute NO to 1 ppm and control the flow rate of mixed gas at  $500 \text{ mL} \cdot \text{min}^{-1}$ . The standard air was first bubbled through a bottle containing water before being mixed with NO. Before the illumination, the feed gas was passed in the dark state for a while until the NO concentration was stable ensuring that the catalyst surface reached the equilibrium of adsorption and desorption. A NO-NO<sub>2</sub>-NO<sub>x</sub> Analyzer (U. S. A. EPA, Model 42i) was used for product analysis. The removal efficiency ( $\eta$ ) of NO was calculated as  $\eta = (1 - C/C_0) \times 100\%$ , where  $C$  and  $C_0$  are the transient and initial concentrations of NO, respectively.

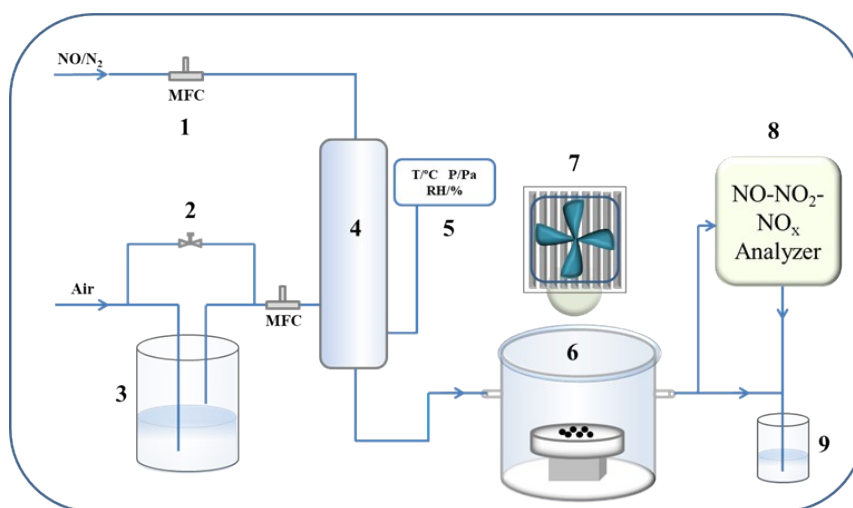

**Scheme S1** Schematic diagram of the photocatalytic NO removal process.

1 - mass flow controller; 2 - ball valve; 3 - bubbler; 4 - gas mixing tank; 5 - temperature and humidity detector; 6 - reactor; 7 - light source; 8 -  $\text{NO-NO}_2\text{-NO}_x$  analyzer; 9 - tail gas collector.

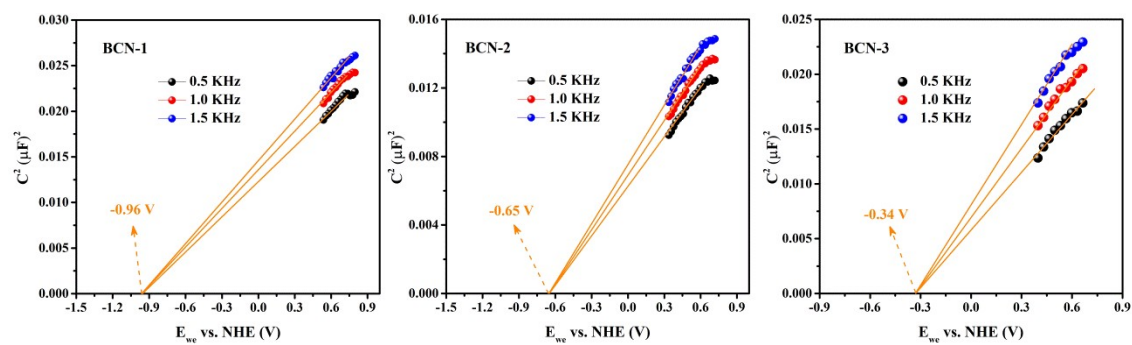

**Fig. S1** Mott-Schottky plots of BCN samples.

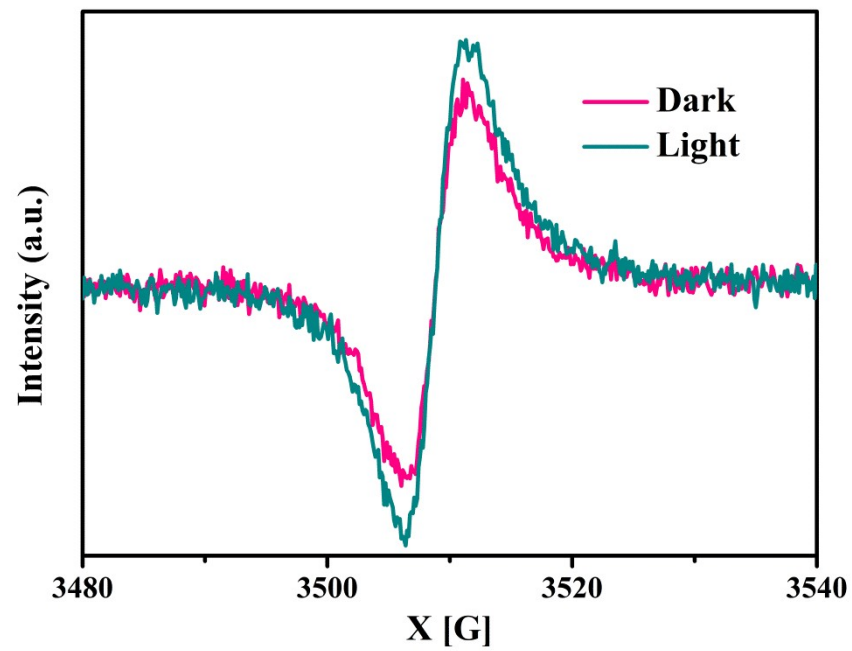

**Fig. S2** EPR pattern of BCN-2 under visible illumination.

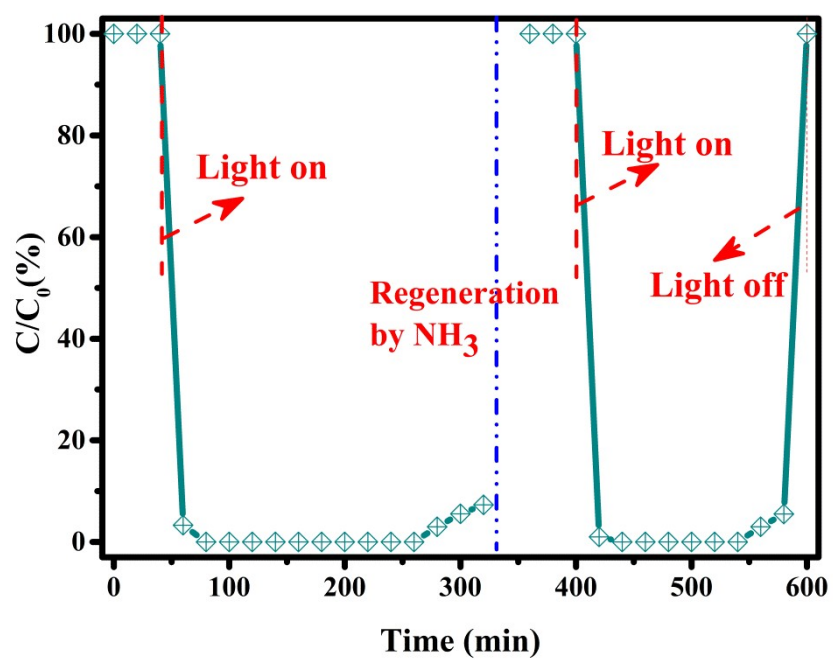

Fig. S3 Long-term stability test for BCN-2 and catalyst regeneration.

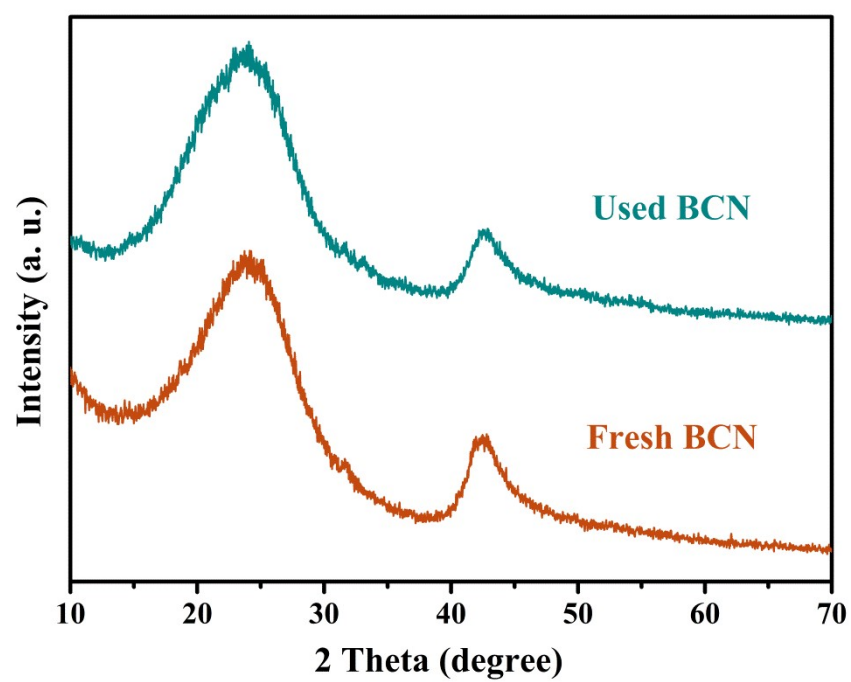

**Fig. S4** The XRD patterns of BCN-2 before and after desulfurization.

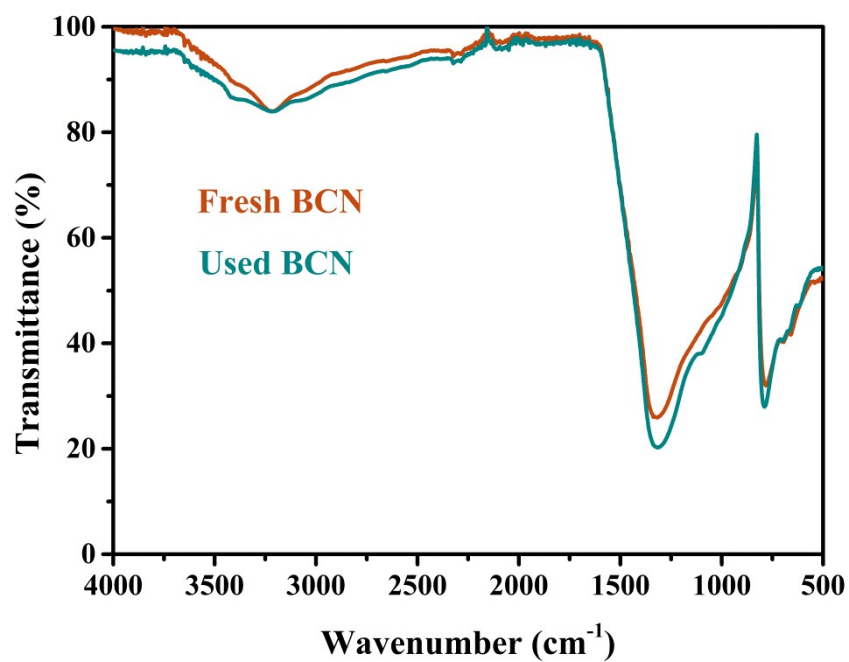

Fig. S5 The FTIR patterns of BCN-2 before and after desulfurization.

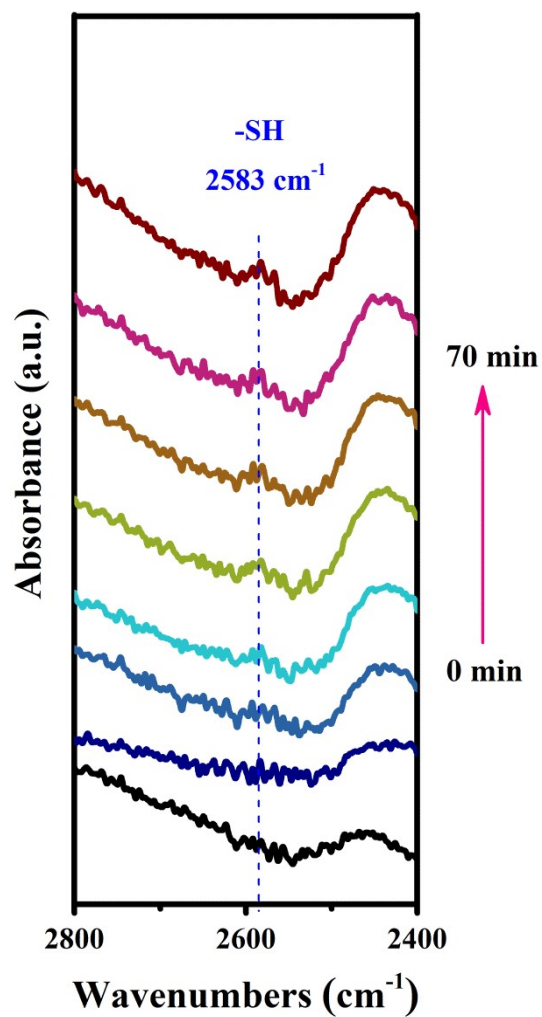

**Fig. S6** In situ DRIFTS testing of  $\text{H}_2\text{S}$  adsorption processes over BCN-2 sample.

As the infrared vibrational signal of  $\text{HS}^-$  is very weak, the test was carried out using 50000 ppm of  $\text{H}_2\text{S}$  ( $\text{N}_2$  as equilibrium gas) gas. Before testing the sample BCN-2 was heated at  $200^\circ\text{C}$  for 2 hours under nitrogen protection to remove surface adsorbed contaminants.

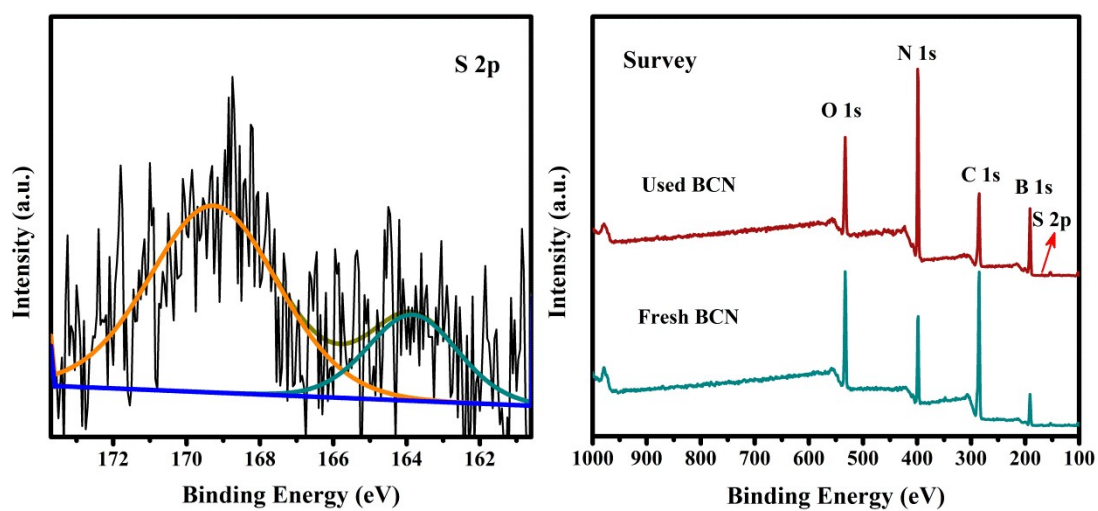

**Fig. S7** The residual S on the surface of the BCN-2 is analyzed by XPS after a long-time photocatalytic process.

**Table S1** Specific surface area, pore size and atomic percent of the BCN samples (Atomic percentage data from XPS tests).

| Samples      | $S_{\text{BET}}$ (m <sup>2</sup> /g) | Pore size (nm) | Atomic % |       |       |
|--------------|--------------------------------------|----------------|----------|-------|-------|
|              |                                      |                | B        | N     | C     |
| <b>BN</b>    | 445                                  | 2.04           | /        | /     | /     |
| <b>BCN-1</b> | 596                                  | 2.08           | 47.38    | 44.95 | 7.67  |
| <b>BCN-2</b> | 759                                  | 2.07           | 44.55    | 42.31 | 13.14 |
| <b>BCN-3</b> | 957                                  | 2.01           | 34.13    | 29.8  | 36.06 |

**Table S2** Detailed information on the normalization of the activity over BCN-2 under different wavelengths.

|                                     | 598nm | 530nm | 495nm | 470nm  | 420nm  | 380nm  |
|-------------------------------------|-------|-------|-------|--------|--------|--------|
| <b><i>P</i> (mW/cm<sup>2</sup>)</b> | 52    | 84    | 134   | 241    | 142    | 120    |
| <b><i>C<sub>0</sub></i> (ppm)</b>   | 21.4  | 21.4  | 21.4  | 21.4   | 21.3   | 21.3   |
| <b><i>C<sub>A</sub></i> (ppm)</b>   | 20.96 | 20.1  | 19.54 | 9.24   | 0.16   | 0.04   |
| <b><i>η</i> (%)</b>                 | 2.056 | 6.075 | 8.692 | 56.822 | 99.249 | 99.812 |
| <b>Normalized<br/><i>η</i> (%)</b>  | 1.142 | 4.821 | 4.324 | 15.718 | 46.596 | 55.451 |

Where ***P*** is the optical power density (mW/cm<sup>2</sup>), ***C<sub>0</sub>*** is the initial H<sub>2</sub>S concentration (ppm), ***C<sub>A</sub>*** is the transient H<sub>2</sub>S concentration (ppm), ***η*** is the removal efficiency of H<sub>2</sub>S (%) and calculated as *formula S1*.

$$\eta = (1 - C_A / C_0) \times 100\% \quad (S1)$$

In this work, the illumination area of the catalyst is a constant value of 1.5 cm<sup>2</sup>. To ensure the accuracy and reasonable comparison result, the removal efficiency of every point wavelength is normalized by the optical power density. Namely, ***Normalized η*** is the H<sub>2</sub>S conversion rate for 100 mW of light irradiation per unit area and is calculated as *formula S2*.

$$\text{Normalized } \eta (\%) = 100 \times \eta / (P \times 1.5) \quad (S2)$$
